# Supplementary material for: Facile fabrication of multilayer films of graphene oxide/copper phthalocyanine with high dielectric properties
Source: Royal Society of Chemistry journal article supplement (doi:10.1039/c5ra20022a), 2015-01-01
Supplement: c5ra20022a1.pdf [file c5ra20022a1.pdf]

Supporting information

**Facile fabrication of multilayer films of graphene oxide/ copper phthalocyanine with high dielectric properties**

*Zicheng Wang, Renbo Wei\* and Xiaobo Liu\**

Research Branch of Advanced Functional Materials, School of Microelectronics and Solid-State Electronics, High Temperature Resistant Polymers and Composites Key Laboratory of Sichuan Province, University of Electronic Science and Technology of China, Chengdu 610054, China

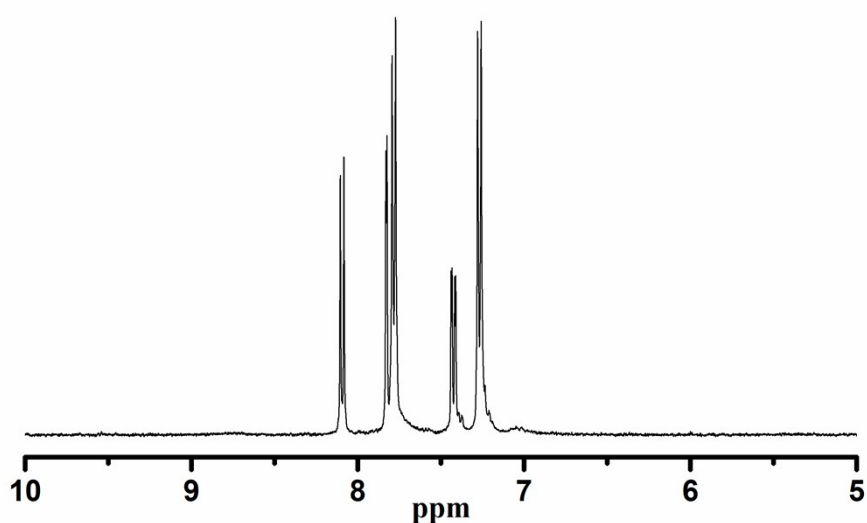

**Fig.S1.** <sup>1</sup>H NMR spectrum of CuPc.

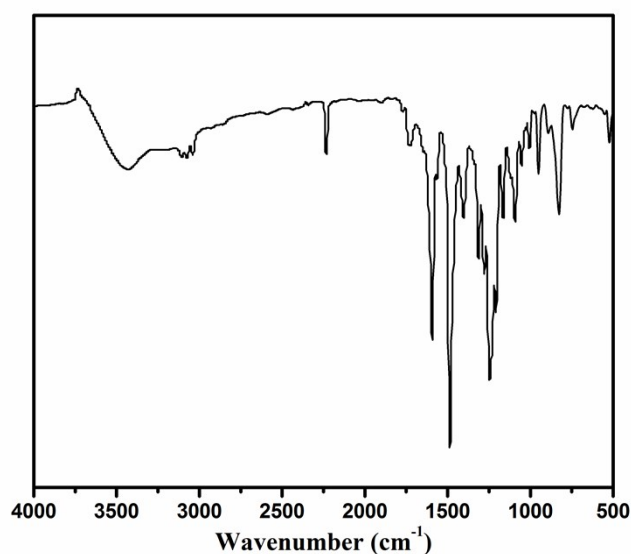

**Fig.S2.** FTIR spectrum of CuPc.

Content of phthalocyanine ring in CuPc was calculated as 10.7 % based on the following observation.

CuPc itself had  $\epsilon = 281$ [1].  $\epsilon$  value of CuPc unit ( $\epsilon_{CuPc\_unit}$ ) in this structure was calculated as  $\epsilon=171.5$ .

$\epsilon$  value of CuPc oligomer ( $\epsilon_{CuPc\_oligomer}$ ) obtained in this paper was found by UV-vis spectra

(Fig.S3(b)) as  $\epsilon=18.4$ . CuPc unit contents in CuPc oligomer (*Contents (%)*) was obtained by the

equation bellow. [1] Whalley M. J. Chem. Soc.1961, 866- 869.

$$Contents(\%) = \frac{\epsilon_{CuPc\_oligomer}}{\epsilon_{CuPc\_unit}} \times 100\% = \frac{18.4}{171.5} \times 100\% = 10.7\%$$

TGA: 415 °C (5% weight loss) (**Fig.S4**);

GPC: Mw=3266, Mn=2317, Mw/Mn=1.41.

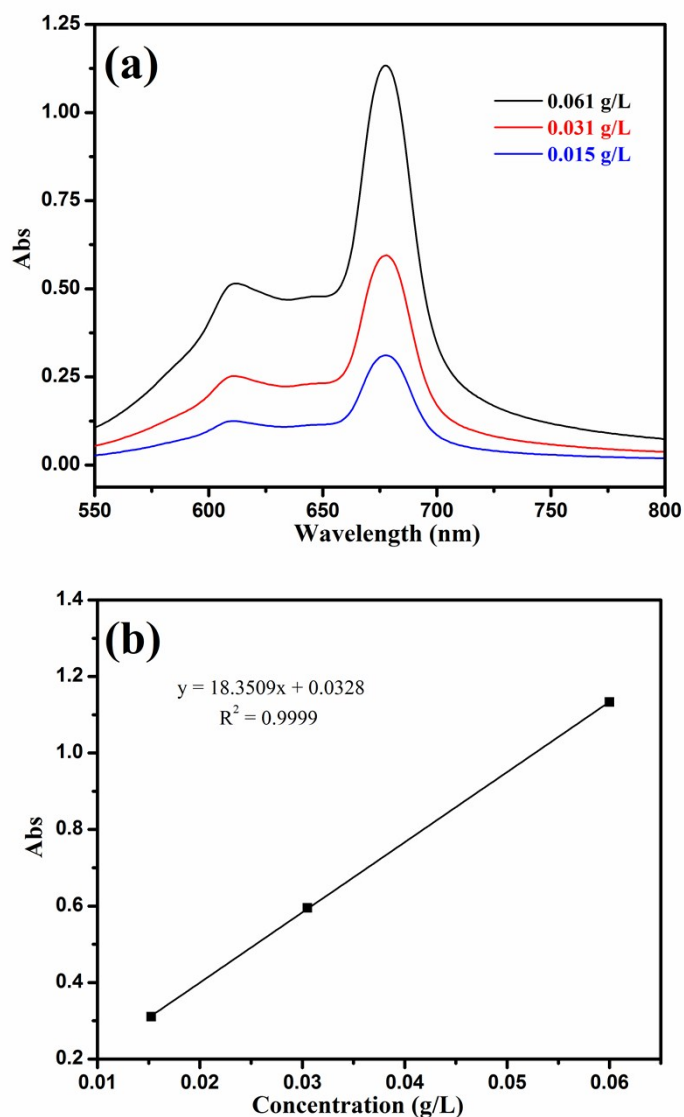

**Fig.S3.** UV-vis spectrum and  $\epsilon$  of CuPc.

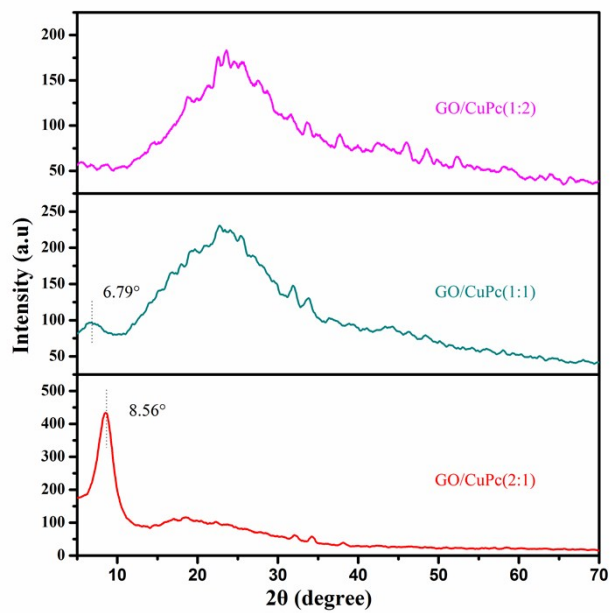

**Fig.S4** XRD patterns of ordered GO/CuPc multilayer films with different ratios of GO and CuPc.

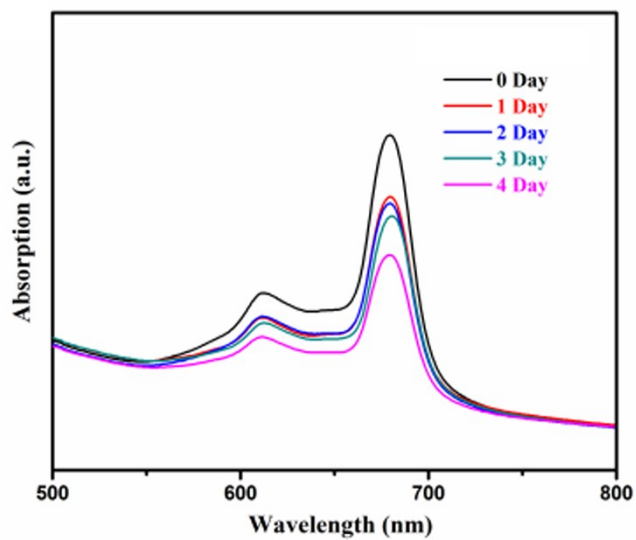

**Fig.S5** UV-vis curves of GO/CuPc dispersion self-assembled for different time.

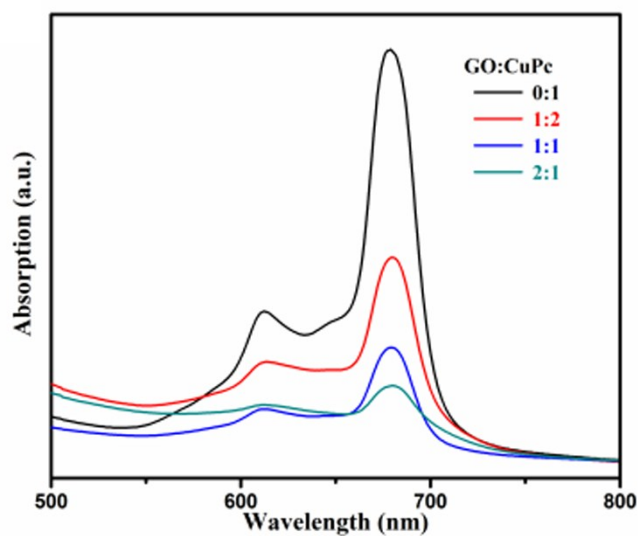

**Fig.S6** UV-vis curves of the fresh prepared GO/CuPc dispersion with different concentrations of GO.

**Table S1** The shoulder peak and Q-band in UV-vis curves of GO/CuPc dispersion self-assembled for different time.

|       | $I_s$ | Shoulder peak (nm) | $I_Q$ | Q-band (nm) | $I_s / I_Q$ |
|-------|-------|--------------------|-------|-------------|-------------|
| 0 Day | 0.387 | 612                | 0.732 | 679         | 0.528       |
| 1 Day | 0.333 | 612                | 0.598 | 679         | 0.557       |
| 2 Day | 0.336 | 612                | 0.583 | 680         | 0.576       |
| 3 Day | 0.322 | 613                | 0.555 | 680         | 0.580       |
| 4 Day | 0.291 | 613                | 0.471 | 680         | 0.618       |

$I_s$  is the intensity of shoulder peak and  $I_Q$  is the intensity of Q-band.  $I_s/I_Q$  is the intensity ratio of shoulder peak and Q-band.

**Table S2** The shoulder peak and Q-band in UV-vis curves of fresh prepared CuPc and GO/CuPc dispersion.

|     | $I_s$ | Shoulder peak (nm) | $I_Q$ | Q-band (nm) | $I_s / I_Q$ |
|-----|-------|--------------------|-------|-------------|-------------|
| 0:1 | 0.934 | 612                | 2.404 | 679         | 0.389       |
| 1:2 | 0.536 | 612                | 1.043 | 679         | 0.514       |
| 1:1 | 0.387 | 612                | 0.732 | 679         | 0.528       |
| 2:1 | 0.410 | 612                | 0.518 | 679         | 0.792       |

$I_s$  is the intensity of shoulder peak and  $I_Q$  is the intensity of Q-band.  $I_s/I_Q$  is the intensity ratio of shoulder peak and Q-band.

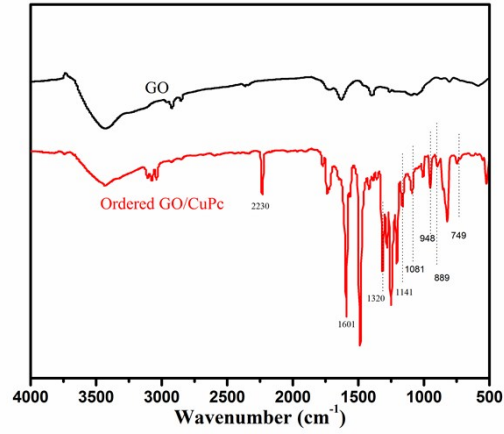

Fig.S7 FTIR spectra of GO and the multilayer film of GO/CuPc.

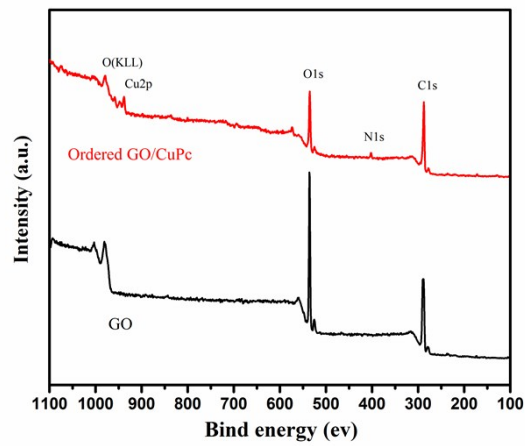

Fig.S8 XPS spectra of GO and the multilayer film of GO/CuPc.

Table S3 Atomic concentrations of GO and multilayer films of GO/CuPc.

| Sample                      | C (at%) | O (at%) | N (at%) | Cu (at%) | C/O ratio |
|-----------------------------|---------|---------|---------|----------|-----------|
| GO                          | 67.07   | 32.93   | 0       | 0        | 2.04      |
| multilayer films of GO/CuPc | 70.90   | 24.46   | 3.28    | 1.37     | 2.90      |

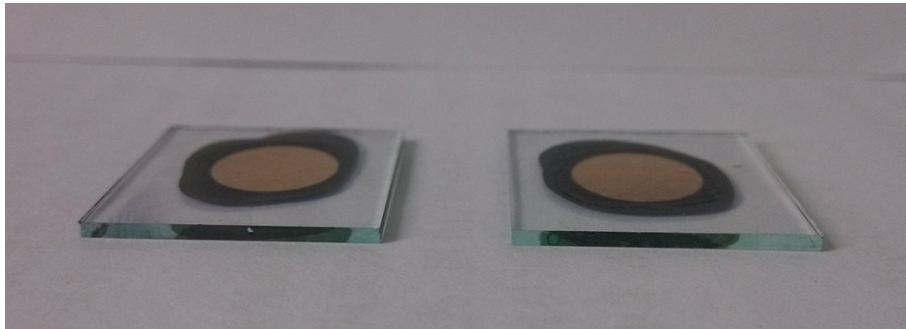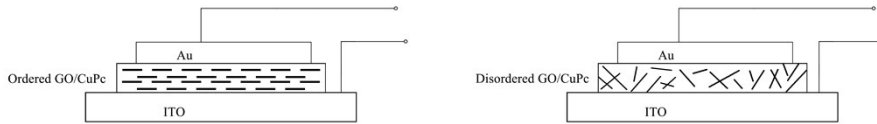

**Fig.S9.** Pictures of the capacitor (top) and schematic illustration (bottom) of parallel-plate capacitor of the GO/CuPc multilayer film (left) and disordered GO/CuPc composite (right).

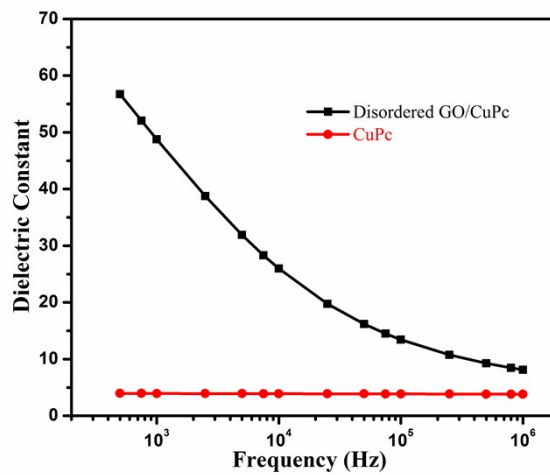

**Fig.10** Dielectric constant of disordered GO/CuPc and CuPc.

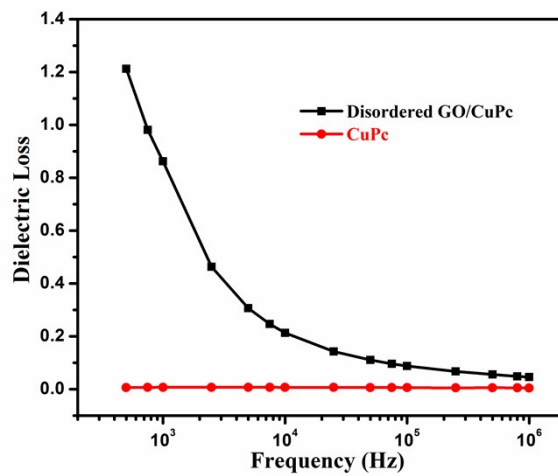

**Fig.11** Dielectric losses of disordered GO/CuPc and CuPc.
